# Supplementary material for: GdIII functionalized gold nanorods for multimodal imaging applications
Source: Royal Society of Chemistry journal article supplement (doi:10.1039/c0nr00929f), 2011-01-01
Supplement: c0nr00929f.pdf [file c0nr00929f.pdf]

## Gd<sup>III</sup> Functionalized Gold Nanorods for Multimodal Imaging Applications

Hongmei Sun,<sup>a,b</sup> Qinghai Yuan,<sup>c</sup> Baohua Zhang,<sup>a</sup> Kelong Ai,<sup>a</sup> Pengguo Zhang<sup>c</sup> and Lehui Lu<sup>\*a</sup>

*a* State Key Laboratory of Electroanalytical Chemistry, Changchun Institute of Applied Chemistry, Chinese Academy of Sciences, Changchun, P. R. China. Fax: +86-43185262406; Tel: +86-43185262418; E-mail: lehuilu@ciac.jl.cn

*b* Graduate School, Chinese Academy of Sciences, Beijing, P. R. China

*c* Department of Radiology, the Second Hospital of Jilin University Norman Bethune, Changchun, P. R. China

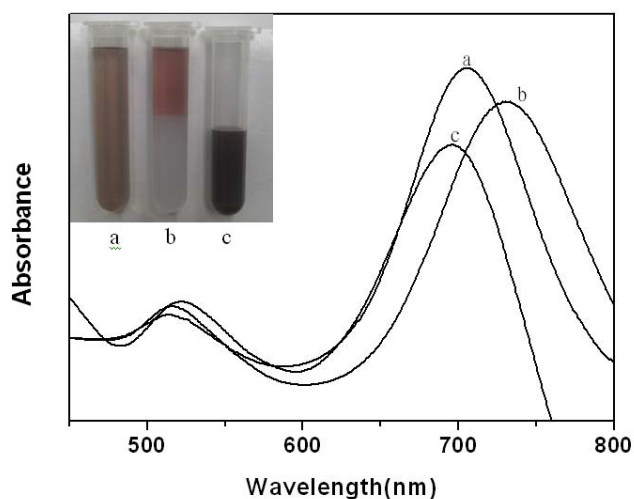

**Fig. S1** The UV-vis spectra and photo (inset) of (a) CTAB-stabilized gold nanorods, (b) gold nanorods after exchanging the ligand with dodecanethiol, (c) the as-prepared nanoprobes.

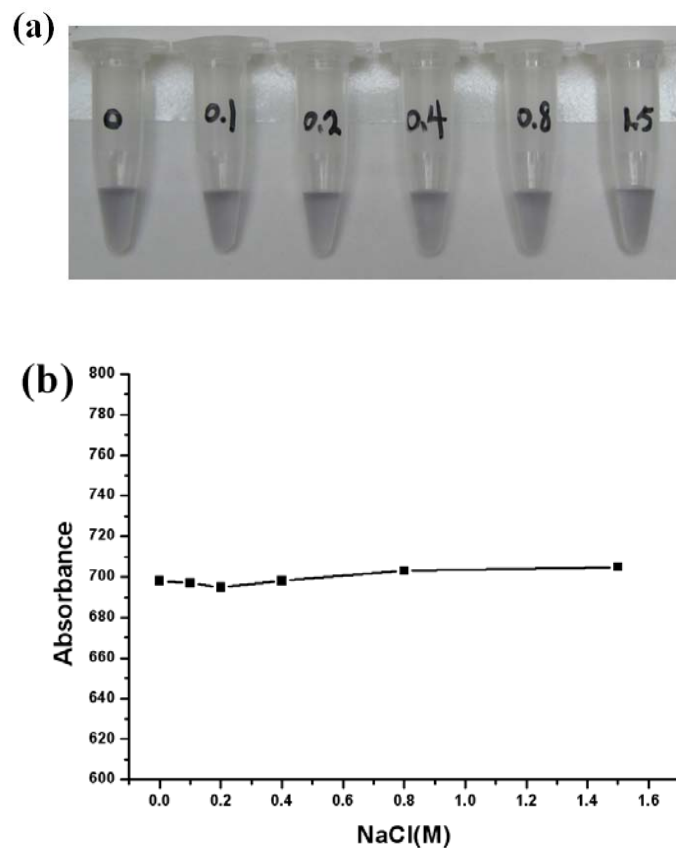

**Fig. S2** (a) Photo and (b) the longitudinal plasmon (LP) absorbance of the as-prepared nanoprobe in aqueous solution at different salt concentrations (0, 0.1, 0.2, 0.4, 0.8, 1.5 M).

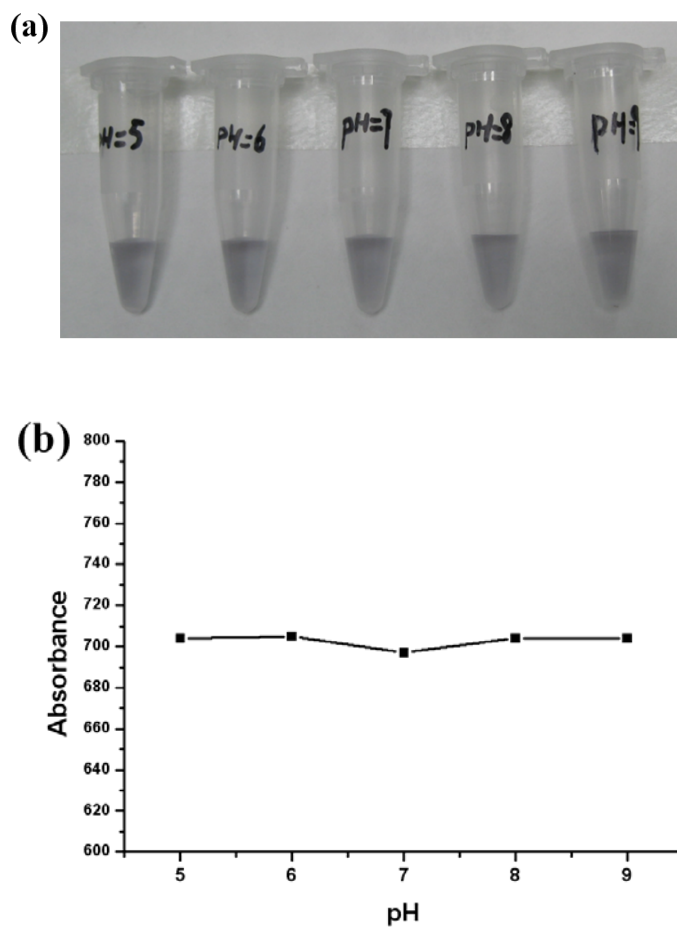

**Fig. S3** (a) Photo and (b) the longitudinal plasmon (LP) absorbance of the as-prepared nanoprobe in aqueous solution at different pH values (pH= 5, 6, 7, 8, 9).

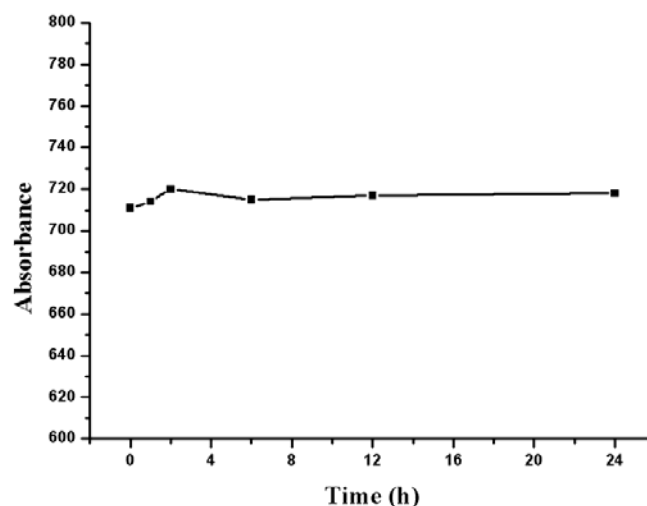

**Fig. S4** The longitudinal plasmon (LP) absorbance of the as-prepared nanoprobes in fetal calf serum at different time (time= 0, 1, 2, 6, 12, 24 h).

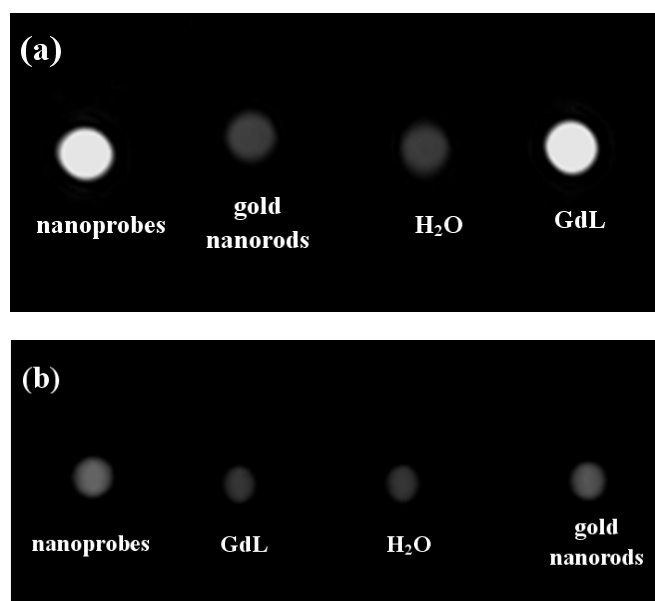

**Fig. S5** (a) MRI and (b) CT imaging of the nanoprobes, GdL, H<sub>2</sub>O and gold nanorods. Nanoprobes contained the same concentrations of gold and Gd elements as gold nanorods and GdL, respectively.

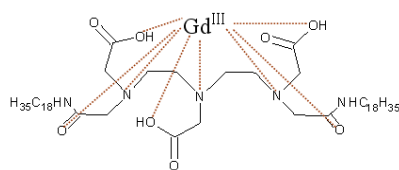

Figure S6. The interactions between Gd<sup>III</sup> ions and L
